# Supplementary material for: Invasive growth of Aspergillus oryzae in rice koji and increase of nuclear number
Source: PubMed Central journal article supplement (PMC7275602; doi:10.1186/s40694-020-00099-9), 2020-06-05

# Additional file 10: Figure S2

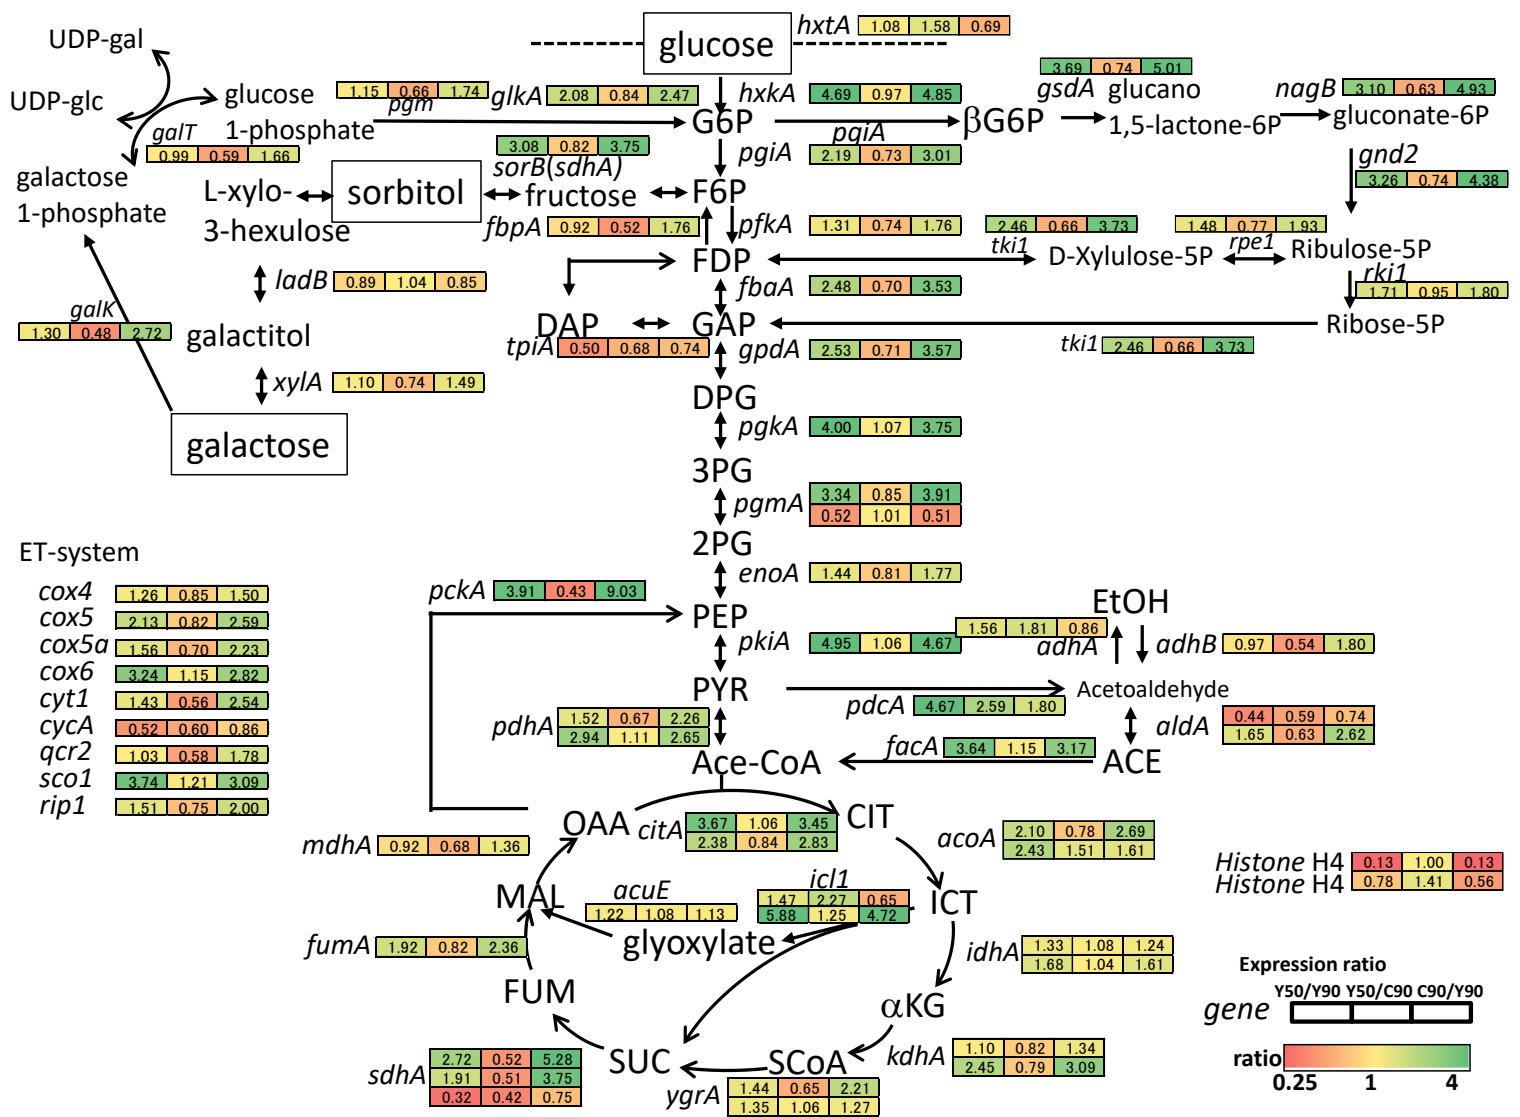

Supplement: 40694_2020_99_MOESM10_ESM.pdf [file 40694_2020_99_MOESM10_ESM.pdf]
