# Supplementary material for: Invasive growth of Aspergillus oryzae in rice koji and increase of nuclear number
Source: PubMed Central journal article supplement (PMC7275602; doi:10.1186/s40694-020-00099-9), 2020-06-05

Additional file 11: Figure S3

*A. oryzae* GFP-H2B in rice *koji*

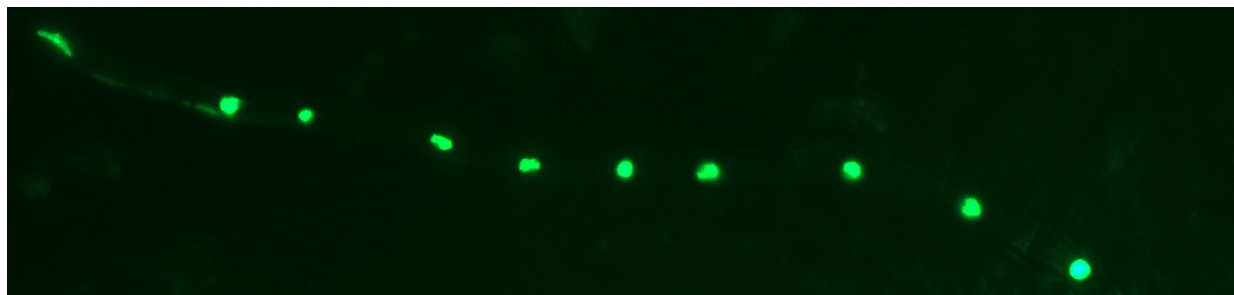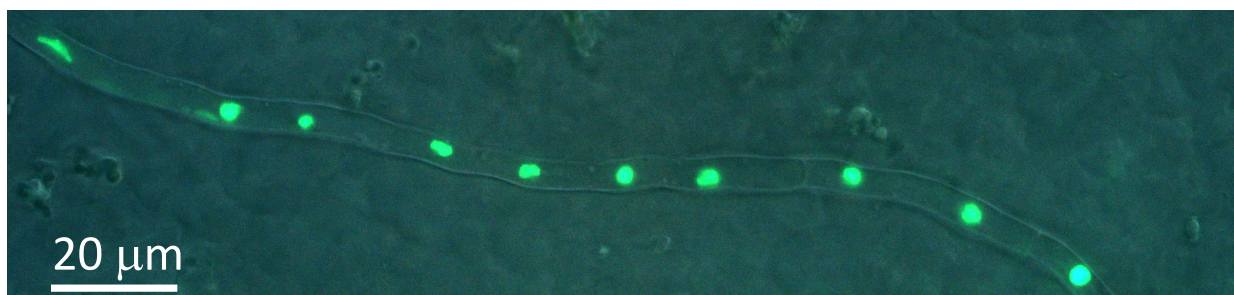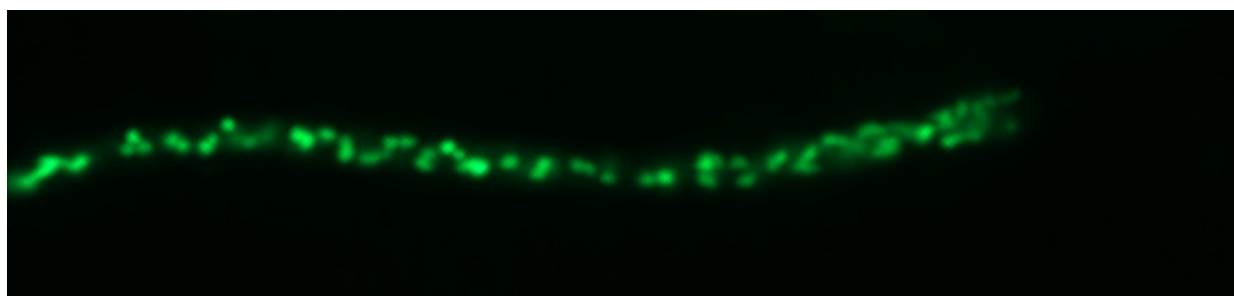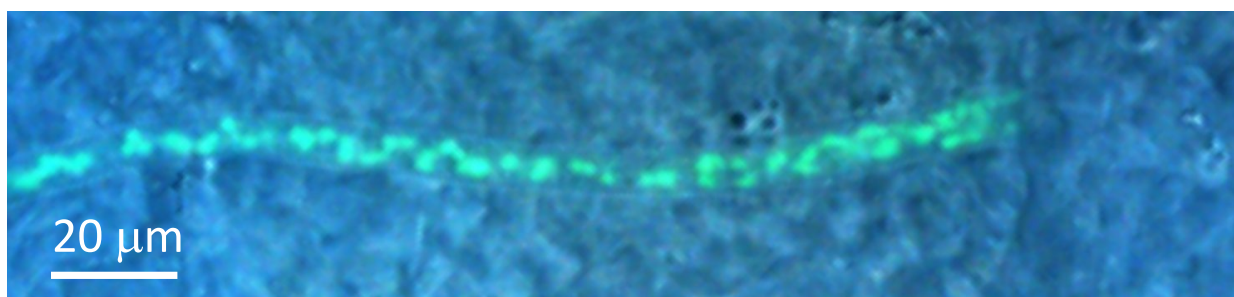

Supplement: 40694_2020_99_MOESM11_ESM.pdf [file 40694_2020_99_MOESM11_ESM.pdf]
