# Supplementary material for: Invasive growth of Aspergillus oryzae in rice koji and increase of nuclear number
Source: Fungal Biol Biotechnol. 2020 Jun 5;7:8. doi: 10.1186/s40694-020-00099-9 (PMC7275602; doi:10.1186/s40694-020-00099-9)
Supplement: Supplementary file 9 — Additional file 9. Table S1. Transcriptome analysis of genes related to sake brewing. [file 40694_2020_99_MOESM9_ESM.xlsx]

## Sheet: Sheet1
Name	GO		TPM(Y50)	TPM(Y90)	TPM(C90)	Y50/Y90		Original symbol	Assigned symbol	Original description	Assigned description
[Amylolytic enzyme]
AO090120000196	#N/A	3.2 [G] Carbohydrate transport and metabolism	3173.86	615.435	2646.54	5.15711		amyC	amy1	conserved protein similar to AO090023000944. Alpha-amylase	Alpha-amylase		amyB
AO090023000944	#N/A	3.2 [G] Carbohydrate transport and metabolism	3164.95	618.545	2621.83	5.11676		amyC	amy1	conserved protein similar to AO090023000944. Alpha-amylase	Alpha-amylase		amyC
AO090003001591								amyA	amy3				amyA
AO090010000746		6 Unannotated	42.2172	24.8158	45.7837	1.70122		glaA	glaA	Glucoamylase; expression levels increase in the presence of starch or maltose; transcribed under submerged and solid culture, protein found only in submerged culture	Glucoamylase		glaA
AO090003000321		6 Unannotated	4141.52	3914.75	4957.77	1.05793		glaB	glaA	Alpha-1,4-glucan glucohydrolase, glucoamylase involved in polysaccharide degradation; expression increases during growth on glucose; some strains do not express glaB; not transcribed in submerged culture; secreted only on solid culture	lucoamylase		glaB
AO090003001209		3.2 [G] Carbohydrate transport and metabolism	181.32	173.891	162.682	1.04272		agdA	agdA	Alpha-glucosidase with a role in hydrolysis of alpha-glucose from non-reducing ends of malto-oligosaccharides; expression induced by maltose	Maltase glucoamylase and related hydrolases, glycosyl hydrolase family 31		agdA
AO090003001208		6 Unannotated	68.541	54.1246	76.2107	1.26635		amyR	mal13	Regulatory protein that indirectly affects production of hemicellulolytic and cellulolytic enzymes, likely through a carbon catabolite repression-mediated control			amyR
AO090038000233		4.1 [R] General function prediction only	5.36466	3.164	3.6838	1.69553		malP	mal61	Putative maltose permease, MFS superfamily; part of the MAL gene cluster; transcriptionally induced by maltose; upregulated by exposure to benomyl	Predicted transporter (major facilitator superfamily)		malP
AO090038000234		3.2 [G] Carbohydrate transport and metabolism	10.9639	6.61906	11.9878	1.65641		malT	MAL2	Putative maltase; part of the MAL gene cluster; transcriptionally induced by maltose	Alpha-amylase		malT
AO090038000235		6 Unannotated	6.18696	3.94458	10.6885	1.56847		malR	SUC1	Transcription factor for maltose utilization (MAL activator); part of the MAL gene cluster	Probable sucrose utilization protein SUC1		malR
[Proteolytic enzyme]
Acid protease
AO090120000474	#N/A	2.10 [O] Posttranslational modification, protein turnover, chaperones	88.3891	1143.08	487.251	0.0773252		pepO	pepA	conserved protein similar to AO090120000474. Aspergillopepsin O, a predicted extracellular aspartic proteinase	Aspartyl protease		pepA
AO090003000693		2.10 [O] Posttranslational modification, protein turnover, chaperones	922.729	1784.11	970.177	0.517192			pepE	aspartic endopeptidase pepE
AO090010000644	GO:0004190	2.10 [O] Posttranslational modification, protein turnover, chaperones	282.068	178.89	162.617	1.57677				PepAc peptidase
AO090701000002	#N/A	2.10 [O] Posttranslational modification, protein turnover, chaperones	182.527	114.041	187.954	1.60054				Aspartic-type endopeptidase (OpsB)
AO090020000517	GO:0004252	2.10 [O] Posttranslational modification, protein turnover, chaperones	1303.83	2105.29	1959.19	0.619314				oryzin homolgue
Carboxypeptidase
AO090120000008	GO:0005576	6 Unannotated	0.206664	0.154461	0.577549	1.33797			MCPB	Carboxypeptidase, Putative carboxypeptidase
AO090020000288	GO:0004180	3.3 [E] Amino acid transport and metabolism	10.352	46.468	22.2741	0.222778			CPS1	Carboxypeptidase	Ortholog(s) have carboxypeptidase activity, role in nitrogen compound metabolic process, proteolysis involved in cellular protein catabolic process and fungal-type vacuole lumen localization
AO090009000593	GO:0016787	4.1 [R] General function prediction only	6.70128	12.3974	13.9223	0.540537			Pm20d2	Carboxypeptidase	Metal-dependent amidase/aminoacylase/carboxypeptidase
AO090023000409	GO:0016787	4.1 [R] General function prediction only	0.402769	0.286695	0.675353	1.40487			Pm20d2	Carboxypeptidase	Metal-dependent amidase/aminoacylase/carboxypeptidase
AO090026000702	GO:0016787	4.1 [R] General function prediction only	31.5639	8.94959	53.4212	3.52685			AbgB	Carboxypeptidase	Metal-dependent amidase/aminoacylase/carboxypeptidase
AO090103000299	GO:0016787	4.1 [R] General function prediction only	0.71577	1.1672	0.581908	0.613237			Pm20d2	Carboxypeptidase	Metal-dependent amidase/aminoacylase/carboxypeptidase
AO090005000315	GO:0016787	4.1 [R] General function prediction only	6.39273	3.04638	3.30978	2.09847			Pm20d2	Carboxypeptidase	Metal-dependent amidase/aminoacylase/carboxypeptidase
AO090103000026	GO:0004185	3.3 [E] Amino acid transport and metabolism	40.5161	30.1996	82.0673	1.34161			SCPA	Carboxypeptidase (CpI)	Serine carboxypeptidases (lysosomal cathepsin A)
AO090012000706	GO:0004185	3.3 [E] Amino acid transport and metabolism	11.9517	52.9627	31.0021	0.225662			SCPA	Carboxypeptidase (OcpA)	Serine carboxypeptidases (lysosomal cathepsin A)
AO090701000220	GO:0005576	3.3 [E] Amino acid transport and metabolism	25.4258	32.808	46.1357	0.774987			SCPA	Carboxypeptidase (OcpB)	Serine carboxypeptidases (lysosomal cathepsin A)
AO090020000351	#N/A	3.3 [E] Amino acid transport and metabolism	36.9184	74.1301	51.9336	0.498021		ocpO	cpdS	Carboxypeptidase (OcpO)	Serine carboxypeptidases (lysosomal cathepsin A)
AO090005001632	#N/A	3.3 [E] Amino acid transport and metabolism	42.7948	36.0648	31.4816	1.18661		kexA	kex1	Carboxypeptidase (KexA)	Serine carboxypeptidases (lysosomal cathepsin A)
AO090103000153	#N/A	3.3 [E] Amino acid transport and metabolism	252.656	133.93	139.964	1.88648		ocpA	SCPA	Carboxypeptidase, Putative serine-type carboxypeptidase; stable at temperatures below 45 degrees C and low pH; broad substrate specificity for N-acylpeptides	Serine carboxypeptidases (lysosomal cathepsin A)
AO090103000332	GO:0004185	3.3 [E] Amino acid transport and metabolism	351.222	206.802	425.215	1.69835			cpyA	Carboxypeptidase, Ortholog(s) have serine-type carboxypeptidase activity, role in phytochelatin biosynthetic process and endoplasmic reticulum, extracellular region, fungal-type vacuole localization	Serine carboxypeptidases (lysosomal cathepsin A)
AO090010000534	GO:0004185	3.3 [E] Amino acid transport and metabolism	12.9423	5.84745	53.019	2.21333			pepF	Carboxypeptidase	Serine carboxypeptidases (lysosomal cathepsin A)
AO090023000382	GO:0004185	3.3 [E] Amino acid transport and metabolism	48.1407	47.8563	41.0162	1.00594			SCPA	Carboxypeptidase	Serine carboxypeptidases (lysosomal cathepsin A)
AO090023000848	GO:0004185	3.3 [E] Amino acid transport and metabolism	1.02564	0.262821	1.83442	3.90242			kex1	Carboxypeptidase	Serine carboxypeptidases (lysosomal cathepsin A)
AO090026000680	GO:0004185	3.3 [E] Amino acid transport and metabolism	0.200652	0.0428479	0.785046	4.6829			SCPA	Carboxypeptidase	Serine carboxypeptidases (lysosomal cathepsin A)
AO090120000232	GO:0004185	3.3 [E] Amino acid transport and metabolism	17.0559	10.6557	18.8634	1.60064			pepF	Carboxypeptidase	Serine carboxypeptidases (lysosomal cathepsin A)
AO090166000075	GO:0016787	3.3 [E] Amino acid transport and metabolism	1.15231	1.18113	3.23868	0.975604			ArgE	carboxypeptidase	Aminoacylase ACY1 and related metalloexopeptidases
AO090026000680	GO:0004185	3.3 [E] Amino acid transport and metabolism	0.200652	0.0428479	0.785046	4.6829			SCPA	carboxypeptidase OcpB [Merops]	Serine carboxypeptidases (lysosomal cathepsin A)
AO090023000382	GO:0004185	3.3 [E] Amino acid transport and metabolism	48.1407	47.8563	41.0162	1.00594			SCPA	carboxypeptidase OcpB [Merops]	Serine carboxypeptidases (lysosomal cathepsin A)
protease TF
AO090003001577									prtT	Ortholog(s) have role in protein catabolic process and nucleus localization	Transcriptional activator of proteases prtT		prtT
[Lipid metabolism]
AO090124000083	GO:0004316	3.6 [I] Lipid transport and metabolism	94.5592	16.7742	119.845	5.63718		fasA	fasA	conserved protein similar to AN9407. Fatty acid synthase, alpha subunit	Fatty acid synthase subunit alpha
AO090124000084	GO:0004313	3.6 [I] Lipid transport and metabolism	63.9519	8.68677	70.354	7.36198		fasB	FAS1	conserved protein similar to AN9408. Fatty acid synthase, beta subunit	Fatty acid synthase subunit beta
AO090010000156	GO:0003824	3.6 [I] Lipid transport and metabolism	0.551249	0.127888	0.47167	4.3104		fasB	FAS1	conserved protein weakly similar to AN9408. Fatty acid synthase, beta subunit	Fatty acid synthase subunit beta
AO090005000456	GO:0004768	3.6 [I] Lipid transport and metabolism	1321.68	96.2506	923.748	13.7316		sdeA	OLE1	conserved hypothetical protein similar to AN6731. Putative delta-9-stearic acid desaturase	Fatty acid desaturase
AO090102000339	GO:0016717	3.6 [I] Lipid transport and metabolism	78.3077	3.88594	30.6442	20.1516		sdeB	OLE1	conserved hypothetical protein similar to AN4135. Putative delta-9-stearic acid desaturase	Fatty acid desaturase
AO090026000799	GO:0016717	3.6 [I] Lipid transport and metabolism	11.9532	7.83565	7.65201	1.52549			OLE1	Has domain(s) with predicted heme binding, oxidoreductase activity, acting on paired donors, with oxidation of a pair of donors resulting in the reduction of molecular oxygen to two molecules of water activity	Fatty acid desaturase
AO090103000283	GO:0016717	3.6 [I] Lipid transport and metabolism	47.2744	104.791	64.1945	0.451132			OLE1	Has domain(s) with predicted heme binding, oxidoreductase activity, acting on paired donors, with oxidation of a pair of donors resulting in the reduction of molecular oxygen to two molecules of water activity	Acyl-CoA desaturase
AO090001000224	GO:0016720	3.6 [I] Lipid transport and metabolism	496.378	133.955	450.861	3.70557			MAW3	Ortholog(s) have delta12-fatty acid dehydrogenase activity and role in asexual sporulation resulting in formation of a cellular spore, unsaturated fatty acid biosynthetic process	Fatty acid desaturase
AO090010000714	GO:0006633	3.6 [I] Lipid transport and metabolism	47.0709	5.45683	30.8803	8.62605		an2	MAW3	conserved hypothetical protein similar to AN7204. Putative oleoyl-delta12 desaturase	Fatty acid desaturase
AO090011000040	GO:0003824	3.6 [I] Lipid transport and metabolism	4.79513	8.06014	6.80255	0.594919			fas1	Has domain(s) with predicted catalytic activity, enoyl-[acyl-carrier-protein] reductase (NADH) activity, fatty acid synthase activity, oxidoreductase activity, transferase activity	Fatty acid synthase subunit beta				beta
AO090010000156	GO:0003824	3.6 [I] Lipid transport and metabolism	0.551249	0.127888	0.47167	4.3104			fas1	Ortholog(s) have role in fatty acid biosynthetic process, secondary metabolite biosynthetic process	Fatty acid synthase subunit beta				beta
AO090010000108	GO:0003824	3.6 [I] Lipid transport and metabolism	0.695089	0.35966	0.612638	1.93262			fas1	Ortholog(s) have role in fatty acid biosynthetic process, secondary metabolite biosynthetic process	Fatty acid synthase subunit beta				beta
AO090011000046	GO:0004190	3.8 [Q] Secondary metabolites biosynthesis, transport and catabolism	15.3413	25.5874	14.3228	0.599566			fasA	Has domain(s) with predicted aspartic-type endopeptidase activity, catalytic activity, transferase activity and role in metabolic process, proteolysis	Fatty acid synthase subunit alpha				alpha
AO090010000107	GO:0016740	3.8 [Q] Secondary metabolites biosynthesis, transport and catabolism	0.442289	0.260545	0.554083	1.69755			fasA	Ortholog(s) have role in secondary metabolite biosynthetic process	Fatty acid synthase subunit alpha				alpha
AO090010000171	GO:0008897	3.6 [I] Lipid transport and metabolism	0.147414	0.16568	0.112749	0.889751			fasA	Has domain(s) with predicted catalytic activity, holo-[acyl-carrier-protein] synthase activity, magnesium ion binding, transferase activity and role in fatty acid biosynthetic process, macromolecule biosynthetic process, metabolic process	Fatty acid synthase subunit alpha				alpha
fatty acid synthase TF
AO090011000961								farA	CTF1-ALPHA	Cutinase transcription factor 1 alpha, regulates expression of genes involved in degradation of biodegradable plastics	Cutinase transcription factor 1 alpha
AO090103000027	GO:0044212	6 Unannotated	7.16574	2.602	11.8036	2.75393		farB	CTF1-BETA	Cutinase transcription factor 1 beta	Cutinase transcription factor 1 beta
lipase related
AO090001000143	GO:0016298	3.6 [I] Lipid transport and metabolism	177.748	168.666	54.1803	1.05385		-	LIP	Putative lipase	Predicted lipase
AO090003001432	GO:0016298	6 Unannotated	0.425391	0.415266	0.271728	1.02438		-	LIP4	Ortholog(s) have lipase activity	Lipase A {ECO:0000250|UniProtKB:W3VKA4}
AO090120000164	GO:0006629	2.4 [T] Signal transduction mechanisms	6.26297	2.34669	4.89293	2.66886		-	-	Has domain(s) with predicted triglyceride lipase activity and role in lipid metabolic process	-
AO090701000644	#N/A	6 Unannotated	54.6401	46.7872	21.85	1.16784		mdlB	mdlA	Monoacylglycerol and diacylglycerol lipase, extracellular enzyme with role in lipid hydrolysis	Mono- and diacylglycerol lipase
AO090003001507	#N/A	6 Unannotated	5.03106	29.1113	13.6668	0.172821		tglA	cutA	Triacylglycerol lipase with role in degradation of triglycerides	Cutinase
AO090005000029	#N/A	6 Unannotated	5.80157	5.78146	4.39558	1.00348		cutL	cutL	Extracellular lipase (cutinase) with role in lipid degradation; expression altered by manR disruption but not by ManR overexpression	Cutinase 1
AO090001000207	GO:0030600	3.6 [I] Lipid transport and metabolism	1.95671	2.50706	1.69517	0.780483		-	faeA	Feruloyl esterase; predicted secretion signal peptide; positively regulated by XlnR; 2 putative XlnR binding sites in the promoter	Predicted lipase
AO090003000839	GO:0004806	4.1 [R] General function prediction only	248.422	40.24	186.335	6.17352		-	TGL5	Ortholog(s) have triglyceride lipase activity, role in triglyceride mobilization and cytoplasm localization	Predicted esterase of the alpha-beta hydrolase superfamily
AO090001000073	#N/A	6 Unannotated	18.0053	167.898	5.94527	0.107239		splaA	-	Secretory phospholipase A(2), sPLA(2); strongly upregulated in response to carbon starvation, oxidative stress and during conidiation; most abundant in hyphal tips	-
AO090005000433	GO:0004630	3.6 [I] Lipid transport and metabolism	154.756	42.6652	158.084	3.62722		-	SPO14	Ortholog(s) have phospholipase D activity and role in phospholipid metabolic process	Phospholipase D1
AO090012000083	GO:0016788	2.5 [M] Cell wall/membrane/envelope biogenesis	609.801	148.251	485.683	4.1133		-	NPC6	Has domain(s) with predicted hydrolase activity, acting on ester bonds activity	Phospholipase C
AO090023000480	GO:0016787	3.6 [I] Lipid transport and metabolism	4.19467	42.2569	5.70415	0.099266		-	Aes	Has domain(s) with predicted hydrolase activity and role in metabolic process	Esterase/lipase
AO090023000685	GO:0009395	3.6 [I] Lipid transport and metabolism	211.951	57.7779	120.386	3.66837		-	plb1	Ortholog(s) have cytosol, endoplasmic reticulum, nucleus localization	Lysophospholipase
AO090103000073	GO:0016788	2.5 [M] Cell wall/membrane/envelope biogenesis	315.267	203.779	146.292	1.5471		-	PlcC	Has domain(s) with predicted hydrolase activity, acting on ester bonds activity	Phospholipase C
AO090701000405	GO:0003674	3.3 [E] Amino acid transport and metabolism	173.006	594.917	228.526	0.290807		-	FUB4	Ortholog of A. nidulans FGSC A4 : AN10993, A. fumigatus Af293 : Afu2g01310, A. niger CBS 513.88 : An03g05110, Aspergillus wentii : Aspwe1_0173185 and Aspergillus carbonarius ITEM 5010 : Acar5010_152427	Phospholipase/carboxyhydrolase
[Phosphatase(phytase)]
AO090023000692	#N/A	4.1 [R] General function prediction only	246.121	55.56	90.7072	4.42983		phyA	phyA	conserved protein similar to AO090023000692. Phytase (myo-inositol-hexakisphosphate phosphohydrolase), secreted enzyme that dephosphorylates phytate to myo-inositol and inorganic phosphate	Multiple inositol polyphosphate phosphatase		aphA
AO090120000167	GO:0004725	4.1 [R] General function prediction only	9.19656	4.68487	5.72852	1.96303		phyB	phyB	Ortholog(s) have 3-phytase activity, acid phosphatase activity, protein tyrosine phosphatase activity and role in cellular response to vitamin B1 starvation, dephosphorylation, thiamine biosynthetic process	Multiple inositol polyphosphate phosphatase		aphB
AO090010000202	GO:0003993	4.1 [R] General function prediction only	6.06137	7.58764	10.1051	0.798847			aphC	Ortholog(s) have extracellular region localization	Multiple inositol polyphosphate phosphatase
AO090011000174	GO:0003993	4.1 [R] General function prediction only	109.683	153.417	124.738	0.714931		pho1	aphD	Has domain(s) with predicted acid phosphatase activity	Multiple inositol polyphosphate phosphatase
AO090023000448	GO:0003993	4.1 [R] General function prediction only	0.648475	0.503554	0.593098	1.2878		phyB	aphE	Has domain(s) with predicted acid phosphatase activity	Multiple inositol polyphosphate phosphatase
AO090023000481	GO:0003993	4.1 [R] General function prediction only	16.3794	24.7805	7.94501	0.660977		pho1	aphF	Has domain(s) with predicted acid phosphatase activity	Multiple inositol polyphosphate phosphatase
AO090124000063	GO:0003993	4.1 [R] General function prediction only	3.5265	2.43637	2.66671	1.44744		phyA	aphG	Ortholog(s) have extracellular region localization	Multiple inositol polyphosphate phosphatase		acidphosphatase
AO090005000912	GO:0003993	4.1 [R] General function prediction only	1.47802	0.708762	1.73916	2.08535			aphH	Has domain(s) with predicted acid phosphatase activity	Multiple inositol polyphosphate phosphatase
AO090103000338	GO:0003993	3.2 [G] Carbohydrate transport and metabolism	16.6697	8.4519	13.0539	1.9723			aphA	Has domain(s) with predicted acid phosphatase activity, hydrolase activity, metal ion binding activity		Acid phosphatase
AO090103000018	GO:0003677	6 Unannotated	24.7934	9.79276	36.728	2.53181			pacG	rtholog(s) have role in response to starvation	Protein pacG	Acid phosphatase
AO090011000300	GO:0003993	6 Unannotated	427.673	259.961	117.476	1.64514			pacA	Ortholog(s) have acid phosphatase activity and extracellular region, fungal-type cell wall localization	Acid phosphatase	Acid phosphatase
AO090011000115	GO:0016788	6 Unannotated	0	0	0.269355	#DIV/0!			phoA	Has domain(s) with predicted hydrolase activity, acting on ester bonds activity	Acid phosphatase	Acid phosphatase
AO090009000416	GO:0003993	6 Unannotated	436.382	257.853	447.3	1.69237			phoA	Ortholog(s) have acid phosphatase activity and extracellular region, fungal-type cell wall localization	Acid phosphatase	Acid phosphatase
AO090012000725	GO:0003824	3.7 [P] Inorganic ion transport and metabolism	567.976	97.1524	165.895	5.84623			pho8	conserved protein weakly similar to PPBH_PSEAB. High molecular weight phosphatase	Alkaline phosphatase
AO090120000280	GO:0000329	3.7 [P] Inorganic ion transport and metabolism	187.06	177.873	208.47	1.05165			phoA	Ortholog(s) have alkaline phosphatase activity and role in cellular response to cadmium ion, detoxification of cadmium ion, nicotinamide nucleotide metabolic process, protein dephosphorylation		Alkaline phosphatase
AO090023000621	GO:0003824	3.7 [P] Inorganic ion transport and metabolism	0.275897	0.0942653	0.863551	2.92681			pho8	Has domain(s) with predicted catalytic activity, phosphatase activity and role in metabolic process	Alkaline phosphatase	Alkaline phosphatase
AO090005000279	GO:0005575	3.7 [P] Inorganic ion transport and metabolism	4.29809	0.734262	0.617737	5.85362			phoD	phosphodiesterase/alkaline phosphatase D	Phosphodiesterase/alkaline phosphatase D	Alkaline phosphatase
[Solid state culture regulation]
AO090005001041	#N/A	4.1 [R] General function prediction only	16.1811	6.6734	17.54	2.42472		brlA	brlA	C2H2 zinc finger transcription factor, fphA- and lreB-dependent light induced regulator of conidiophore development;
AO090026000200	#N/A	4.1 [R] General function prediction only	238.108	50.6042	210.471	4.70529		flbC	flbC	conserved hypothetical protein similar to AN2421. Putative C2H2 zinc finger transcription factor	C2H2-type Zn-finger protein		flbC
AO090026000532	#N/A	6 Unannotated	22.7615	2.8476	14.521	7.99322		flbA	flbA	Putative regulator of G-protein signaling protein; FadA regulator
AO090026000810	GO:0044212	6 Unannotated	33.6491	20.125	33.219	1.67201			flbB	Basic leucine zipper transcription factor involved in regulation of conidiophore development
AO090005000765	GO:0044212	1.3 [K] Transcription	117.043	46.4417	74.5327	2.52022			flbD	Putative transcription factor involved in regulation of asexual and sexual development and in response to nitrogen starvation
AO090102000477	GO:0000981	6 Unannotated	58.9155	8.40778	46.342	7.00726			sfgA	Gal4-type Zn(II)2Cys6 binuclear cluster DNA-binding protein; negative regulator of asexual development
[CCR]
AO090026000464		4.1 [R] General function prediction only	238.298	103.911	258.348	2.29329			creA	Transcription regulatory region DNA binding transcription factor	DNA-binding protein creA		creA
AO090009000320		2.10 [O] Posttranslational modification, protein turnover, chaperones	21.4132	10.1022	39.2484	2.11965			creB	Ubiquitin-specific protease; role in carbon catabolite repression of transcription; deletion alleviates glucose inhibition of conidial germination and increases total secreted amylase activity by increasing amylase gene expression	Probable ubiquitin carboxyl-terminal hydrolase creB		creB
AO090003000149	GO:0045013	4.1 [R] General function prediction only	22.534	15.9782	22.5253	1.41029		creC	creC	conserved protein similar to AN4166. Protein involved in carbon catabolite repression	WD40 protein DMR-N9		creC		CQ10new_03260
AO090003000144	GO:0031625	4.1 [R] General function prediction only	194.507	14.6773	199.791	13.2523		creD	creD	Ortholog(s) have ubiquitin protein ligase binding activity and cytosol localization	Probable HECT-type ubiquitin ligase-interacting protein creD		creD
[Amino acid metabolism regulation]
AO090009000502		1.3 [K] Transcription	76.2773	63.5095	151.395	1.20104		areA	areA	Sequence-specific DNA binding transcription regulatory protein	Nitrogen regulatory protein areA
[Thiamine synthesis]
AO090003000090	#N/A	4.1 [R] General function prediction only	8215.54	1687.65	3929.7	4.86803		sti35	thiA	conserved protein similar to THI4_FUSOX. Thiazole biosynthetic enzyme	Protein involved in thiamine biosynthesis and DNA damage tolerance		Scthi4
AO090102000360	GO:0005622	3.7 [P] Inorganic ion transport and metabolism	2699.53	1727.93	1808.12	1.56229			nmt1	Ortholog(s) have thiamine pyrophosphate binding activity, role in hyphal growth, thiamine biosynthetic process and cytosol, nucleus localization	ABC-type nitrate/sulfonate/bicarbonate transport systems, periplasmic components		Scthi13
AO090011000971									thi20	Ortholog(s) have role in thiamine biosynthetic process and cytosol localization	Phosphomethylpyrimidine kinase		Scthi20/21
AO090011000799	GO:0009228	3.5 [H] Coenzyme transport and metabolism	58.9995	15.3181	58.776	3.85161			thi4	Ortholog(s) have cytosol localization	Probable thiamine biosynthetic bifunctional enzyme		Scthi6
AO090011000561.1										Phosphomethylpyrimidine kinase
AO090012000697									thr3	Has domain(s) with predicted hydrolase activity	Thiamine pyrophosphokinase			8
AO090026000733									thr3	Ortholog(s) have 8-oxo-dGDP phosphatase activity	Thiamine pyrophosphokinase
「Biotin Metabolism 」
AO090009000589	GO:0030170	3.5 [H] Coenzyme transport and metabolism	33.7059	4.85523	41.6912	6.94219			BioF	Ortholog(s) have role in biotin biosynthetic process and peroxisome localization	5-aminolevulinate synthase	8-amino-7-oxononanoate synthase (KAPAsynthease)	AobioF
AO090009000590	GO:0008483	3.3 [E] Amino acid transport and metabolism	107.683	33.1521	105.3	3.24814			BIO3-BIO1	Ortholog(s) have role in biotin biosynthetic process	Adenosylmethionine-8-amino-7-oxononanoate aminotransferase	Dethiobiotin synthase （DAPA、DTPsynthase)	AobioA/D
AO090009000591	GO:0000166	3.7 [P] Inorganic ion transport and metabolism	8.55756	9.02198	11.2888	0.948523			BIO2	Biotin synthase	Biotin synthase	Biotin synthase 2.8.1.6 DTB + 2 SAM + S -> BT + 2 MET + DA BLASTP	AobioB
AO090038000549	GO:0009058	3.5 [H] Coenzyme transport and metabolism	0.664196	0	0.342679	#DIV/0!			BioF	Has domain(s) with predicted catalytic activity, pyridoxal phosphate binding activity and role in biosynthetic process	Glycine C-acetyltransferase/2-amino-3-ketobutyrate-CoA ligase	8-amino-7-oxononanoate synthase
AO090010000518	GO:0008483	3.5 [H] Coenzyme transport and metabolism	15.089	20.8146	26.9629	0.724923			BioA	Has domain(s) with predicted catalytic activity, pyridoxal phosphate binding, transaminase activity	Alanine-glyoxylate aminotransferase AGT2
AO090005001069	GO:0003824	3.5 [H] Coenzyme transport and metabolism	18.3222	9.65493	19.1568	1.89771			Mocs1	Has domain(s) with predicted 4 iron, 4 sulfur cluster binding, catalytic activity, iron-sulfur cluster binding, metal ion binding activity and role in Mo-molybdopterin cofactor biosynthetic process	Molybdenum cofactor biosynthesis pathway protein	Biotin synthase
AO090011000708	GO:0004077	3.5 [H] Coenzyme transport and metabolism	26.6592	18.2449	28.2635	1.46119			BPL1	Ortholog(s) have biotin-[acetyl-CoA-carboxylase] ligase activity, biotin-[pyruvate-carboxylase] ligase activity, role in protein biotinylation and cytoplasm, nucleus localization	Biotin holocarboxylase synthetase/biotin-protein ligase
[Pantotate synthesis ]
AO090001000594	GO:0003864	3.5 [H] Coenzyme transport and metabolism	4.97391	1.6596	7.29761	2.99706			panB	Ortholog(s) have 3-methyl-2-oxobutanoate hydroxymethyltransferase activity, role in pantothenate biosynthetic process, respiratory chain complex IV assembly and mitochondrion localization	Ketopantoate hydroxymethyltransferase		ecm31
AO090005000300	GO:0003824	3.5 [H] Coenzyme transport and metabolism	3.50851	0.817329	2.76322	4.29266			panB	Has domain(s) with predicted 3-methyl-2-oxobutanoate hydroxymethyltransferase activity, catalytic activity and role in pantothenate biosynthetic process	Ketopantoate hydroxymethyltransferase
AO090026000745	GO:0004592	3.5 [H] Coenzyme transport and metabolism	28.7721	15.058	27.6769	1.91076		pan6p	PanC	panthoA	Ortholog(s) have pantoate-beta-alanine ligase activity and role in pantothenate biosynthetic process	Panthothenate synthetase	panthoA, pan6p
AO090009000600	GO:0055114	3.5 [H] Coenzyme transport and metabolism	98.4951	20.1324	30.3124	4.89238			ApbA	Has domain(s) with predicted 2-dehydropantoate 2-reductase activity, NADP binding, coenzyme binding, oxidoreductase activity, oxidoreductase activity, acting on the CH-OH group of donors, NAD or NADP as acceptor activity	Ketopantoate reductase		pan5p
AO090026000569	GO:0055114	3.5 [H] Coenzyme transport and metabolism	6.16216	1.3757	4.85317	4.47929			ApbA	Ortholog(s) have cytosol, nucleus localization	Ketopantoate reductase		pan5p
AO090138000010	GO:0055114	3.5 [H] Coenzyme transport and metabolism	1.98202	2.77649	1.1078	0.713857			ApbA	Has domain(s) with predicted 2-dehydropantoate 2-reductase activity, NADP binding, coenzyme binding, oxidoreductase activity, oxidoreductase activity, acting on the CH-OH group of donors, NAD or NADP as acceptor activity	Ketopantoate reductase		pan5p
AO090020000112	GO:0055114	3.5 [H] Coenzyme transport and metabolism	24.1031	14.6642	18.0471	1.64367			ApbA	Has domain(s) with predicted 2-dehydropantoate 2-reductase activity, NADP binding, coenzyme binding, oxidoreductase activity, oxidoreductase activity, acting on the CH-OH group of donors, NAD or NADP as acceptor activity	Ketopantoate reductase		pan5p
AO090138000046	GO:0055114	3.5 [H] Coenzyme transport and metabolism	5.73448	2.32923	3.36204	2.46197			ApbA	Has domain(s) with predicted 2-dehydropantoate 2-reductase activity, NADP binding, coenzyme binding, oxidoreductase activity, oxidoreductase activity, acting on the CH-OH group of donors, NAD or NADP as acceptor activity	Ketopantoate reductase		pan5p
AO090023000697	GO:0004029	3.1 [C] Energy production and conversion	96.7833	58.5644	153.623	1.65259			aldA	Putative aldehyde dehydrogenase; upregulated hypoxic growth conditions	Aldehyde dehydrogenase		ald2/3p
AO090023000467	GO:0005576	3.1 [C] Energy production and conversion	559.937	1281.97	949.788	0.436777			aldA	Putative aldehyde dehydrogenase; downregulated under hypoxic growth conditions	Aldehyde dehydrogenase		ald2/3p
AO090026000741	GO:0055114	3.1 [C] Energy production and conversion	23.8274	102.951	31.7249	0.231444			aldA	Has domain(s) with predicted oxidoreductase activity, oxidoreductase activity, acting on the aldehyde or oxo group of donors, NAD or NADP as acceptor activity and role in oxidation-reduction process	Aldehyde dehydrogenase		ald2/3p
AO090701000318	GO:0055114	3.1 [C] Energy production and conversion	99.2616	253.124	92.7098	0.392146			ALTA10	Has domain(s) with predicted oxidoreductase activity, oxidoreductase activity, acting on the aldehyde or oxo group of donors, NAD or NADP as acceptor activity and role in oxidation-reduction process	Aldehyde dehydrogenase		ald2/3p
AO090009000417	GO:0055114	3.1 [C] Energy production and conversion	285.73	203.819	125.149	1.40188			CLAH10	Has domain(s) with predicted oxidoreductase activity, oxidoreductase activity, acting on the aldehyde or oxo group of donors, NAD or NADP as acceptor activity and role in oxidation-reduction process	Aldehyde dehydrogenase		ald2/3p
AO090003000775	GO:0055114	3.8 [Q] Secondary metabolites biosynthesis, transport and catabolism	3.78891	0.7977	3.66872	4.7498			PAO4	fms1p	Has domain(s) with predicted oxidoreductase activity and role in oxidation-reduction process	Amine oxidase	fms1p
